# Supplementary material for: Estimation of undernutrition and mean calorie intake in Africa: methodology, findings and implications
Source: Springer Nature journal article supplement (doi:10.1186/1476-072x-8-37), 2009-01-01
Supplement: Additional file 2 [file 1476-072x-8-37-s2.pdf]

## Appendix B Comparison of nutrition surveys

Table B1 Comparison of nutrition surveys for Asian countries

| Country          | Years of surveys | Children with height-for-age <-2sd | Sample-size | Source     |
|------------------|------------------|------------------------------------|-------------|------------|
| Bangladesh       | 1995-96          | 51.4                               | 2614        | Non-DHS    |
|                  | 1996-97          | 54.6                               | 4787        | DHS        |
| Bangladesh       | 1999-2000        | 44.6                               | 5421        | DHS        |
|                  | 2001             | 48.5                               | 71931       | Non-DHS    |
| India (rural)    | 1996-97          | 42.6                               | 22959       | Non-DHS    |
|                  | 1998-99          | 51.6                               | 24396       | DHS        |
| Indonesia (WFA)* | 2000             | 24.6                               | 70602       | Non-DHS    |
|                  | 2001             | 26.1                               | 11693       | Non-DHS    |
| Korea (DPR)      | 2000             | 45.2                               | 4175        | MICS       |
|                  | 2002             | 38.6                               | 5232        | Non DHS    |
| Maldives         | 1994             | 29.6                               | 1994        | Non DHS    |
|                  | 1995             | 26.9                               | 798         | MICS       |
| Mongolia         | 1999             | 24.6                               | 4037        | Non DHS    |
|                  | 2000             | 24.6                               | 5784        | MICS       |
| Myanmar*         | 1997             | 47.8                               | 4894        | Non DHS    |
|                  | 2000             | 34.2                               | 8081        | MICS       |
|                  | 2003             | 32.2                               | 5390        | MICS       |
| Nepal            | 1996             | 48.4                               | 3705        | DHS        |
|                  | 1996             | 53.1                               | 5525        | MICS       |
|                  | 1997/98          | 54.2                               | 17241       | Non DHS    |
|                  | 2001             | 50.5                               | 6409        | DHS        |
| Pakistan         | 1990-91          | 49.6                               | 4056        | DHS        |
|                  | 1990-94          | 36.3                               | 3141        | Non DHS    |
| Sri Lanka        | 1993             | 23.8                               | 3067        | (semi)DHS  |
|                  | 1995             | 20.4                               | 2782        | Non DHS    |
| Sri Lanka        | 2000             | 13.5                               | 2531        | (semi) DHS |
|                  | 2001             | 13.9                               | 1716        | Non DHS    |
| Thailand         | 1993             | 16.0                               | 11748       | Non DHS    |
|                  | 1995             | 13.4                               | 4178        | Non DHS    |
| Vietnam          | 1998             | 35.9                               | 12919       | Non DHS    |
|                  | 1999             | 38.7                               | 93469       | Non DHS    |
|                  | 2000             | 36.5                               | 94469       | Non DHS    |
| Yemen            | 1996             | 44.6                               | 3833        | MICS       |
|                  | 1997             | 51.7                               | 7501        | DHS        |

\*: Corrections made to extrapolate undernutrition in children <3 years to children <5 years, by multiplying percentage children with low height-for-age with factor 1.15; Sources: DHS, WHO

Table B2 Comparison of nutrition surveys for African countries

| Country        | Years of surveys | Children with height-for-age <-2sd | Sample size | Survey organisation | type/ |
|----------------|------------------|------------------------------------|-------------|---------------------|-------|
| CAR*           | 1994/95          | 38.6                               | 2310        | DHS                 |       |
|                | 1995             | 28.4                               | 2225        | Non DHS             |       |
| Chad           | 1996/97          | 40.1                               | 5665        | DHS                 |       |
|                | 2000             | 28.1                               | 5043        | Non DHS             |       |
| Egypt          | 1997-98          | 24.9                               | 3328        | DHS                 |       |
|                | 1998             | 20.6                               | 3997        | DHS                 |       |
|                | 2000             | 18.7                               | 10193       | DHS                 |       |
| Ghana          | 1987-88          | 24.6                               | 1492        | Non DHS             |       |
|                | 1988             | 27.6                               | 2011        | DHS                 |       |
|                | 2003             | 29.9                               | 3183        | DHS                 |       |
|                | 2006             | 22.4                               | 3166        | MICS                |       |
| Guinea         | 1999             | 29.9                               | 2452        | DHS                 |       |
|                | 2000             | 40.9                               | 1457        | Non DHS             |       |
| Kenya          | 1998             | 33.0                               | 4413        | DHS                 |       |
|                | 2000             | 35.3                               | 5917        | MICS                |       |
|                | 2003             | 30.3                               | 5306        | DHS                 |       |
| Madagascar*    | 1995             | 49.8                               | 5049        | MICS                |       |
|                | 1997             | 53.1                               | 3080        | DHS                 |       |
| Malawi         | 1997-98          | 59.1                               | 6309        | Non-DHS             |       |
|                | 2000             | 49.0                               | 9322        | DHS                 |       |
|                | 2004             | 47.8                               | 8520        | DHS                 |       |
|                | 2006             | 45.9                               | 20747       | MICS                |       |
| Mali*          | 1995-96          | 34.6                               | 4678        | DHS                 |       |
|                | 1996             | 48.6                               | n.a.        | MICS                |       |
| Niger*         | 1998             | 47.3                               | 4022        | DHS                 |       |
|                | 2000             | 39.7                               | 4616        | MICS                |       |
| Nigeria        | 2001             | 42.0                               | 4954        | Non DHS             |       |
|                | 2003             | 38.3                               | 4789        | DHS                 |       |
| Rwanda (rural) | 1991-92          | 52.2                               | 1939        | Non DHS             |       |
|                | 1992             | 49.4                               | 4177        | DHS                 |       |
| Senegal        | 1992-93          | 24.7                               | 3865        | DHS                 |       |
|                | 1996             | 22.9                               | n.a.        | MICS                |       |
| Tanzania       | 1996             | 43.4                               | 5344        | DHS                 |       |
|                | 1999             | 43.8                               | 2821        | DHS                 |       |
| Zambia         | 1996/97          | 42.4                               | 5443        | DHS                 |       |
|                | (national)       |                                    |             |                     |       |
|                | 1999 (national)  | 53.0                               | 1095000     | MICS                |       |
|                | 2001 (national)  | 46.8                               | 5784        | DHS                 |       |

\*: Corrections made to extrapolate undernutrition in children <3 years to children <5 years, by multiplying percentage children with low height-for-age with factor 1.15; Sources: DHS, WHO
